# Supplementary material
Source: publisher figshare collection journal article supplement (https://gsapubs.figshare.com/ndownloader/files/23296490)
Supplement: Supplementary file 1 [file 23296490]

## Supplementary Information for:

## Glaciovolcanic evidence for a polythermal Neogene East Antarctic Ice Sheet

J.L. Smellie\* et al.

\*E-mail: [jls55@le.ac.uk](mailto:jls55@le.ac.uk)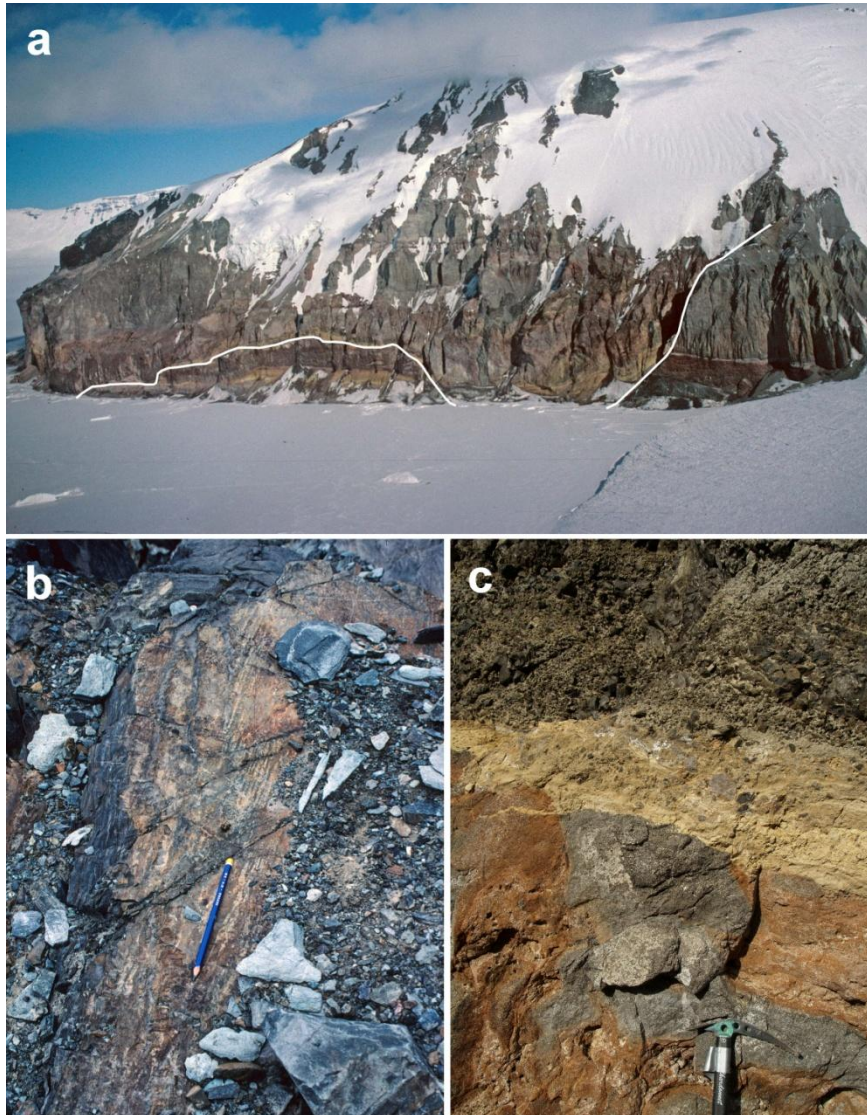

**Figure DR1.** Glaciovolcanic sequences and related features indicative of the basal thermal regime of the EAIS in Victoria Land. 1. Wet-based ice features: (a) prominent erosional unconformity in felsic sheet-like sequences at northern Mandible Cirque, Daniell Peninsula; sequence is ~600 m thick; (b) striated metamorphic basement surface underlying volcanoclastic rocks, west of Hallett Peninsula; striations parallel to pencil; (c) cross section through sharp erosional surface truncating mafic lava pillow (grey) overlain by yellow fluvial sandstones and grey hyaloclastite breccia at Minna Hook.

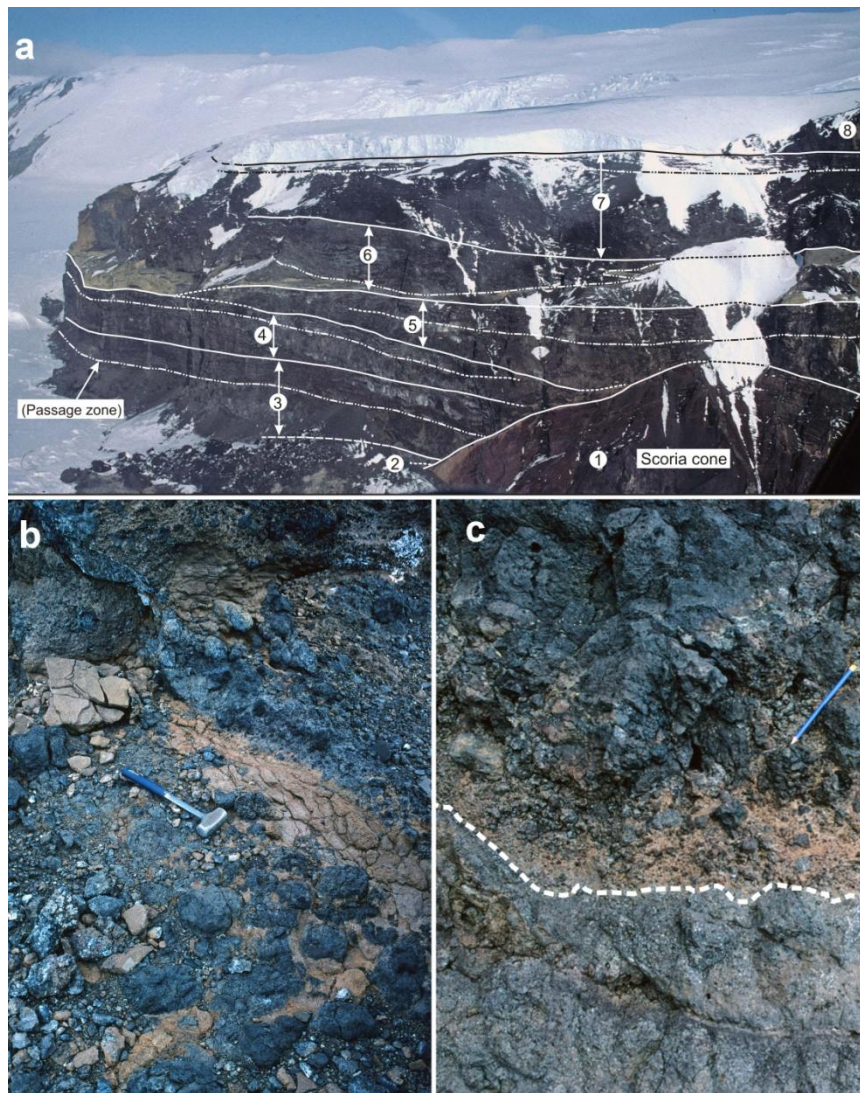

**Figure DR2.** Glaciovolcanic sequences and related features indicative of the basal thermal regime of the EAIS in Victoria Land. Cold-based ice features: (a) ~600 m section of multiple lava-fed deltas (numbered 2-8) lacking erosion and interbedded glacial sediments overlying an erosionally unmodified basal scoria cone; Cape Phillips, Daniell Peninsula; (b)-(c) plan and cross sectional views of a rough-textured surface between two lava-fed deltas, showing a general lack of glacial erosion and (in b) presence of essentially unmodified lava clinkers; northern Daniell Peninsula.

**Table DR1.** Inferred basal thermal regimes and age of ice associated with glaciovolcanic sequences in Victoria Land

| Locality                                                                                               | Age (Ma)*              | Interpreted thermal regime  | Comments                                                                                                                                                          |
|--------------------------------------------------------------------------------------------------------|------------------------|-----------------------------|-------------------------------------------------------------------------------------------------------------------------------------------------------------------|
| Cape Washington<br>[74° 38.59'S, 165° 25.32'E]                                                         | 2.88±0.008 – 1.73±0.04 | <b>Cold-based</b>           | Multiple lava-fed deltas (2 dated)                                                                                                                                |
| Cape Adare, Adare Peninsula (eruptions)<br>[71° 17.85'S, 170° 12.93'E]                                 | c. 3.8                 | <b>Cold-based</b>           | Sequence examined at top only, by helicopter elsewhere; age by K-Ar only                                                                                          |
| Cape Adare, Adare Peninsula (unconformity within sequence)<br>[71° 17.85'S, 170° 12.93'E]              | >3.8                   | <b>Wet-based</b>            | Prominent erosional glacial unconformity within volcanic sequence; age uncertain (by K-Ar only); probably caused by expanded much thicker ice sheet               |
| 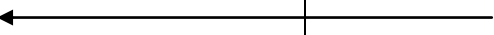                      |                        | <b>Substantial time gap</b> |                                                                                 |
| West of Cape Daniell, Daniell Peninsula<br>[72° 40.33'S, 169° 43.07'E]                                 | 6.34±0.05 – 5.6±0.5    | <b>Cold-based</b>           | Multiple lava-fed deltas; top & base deltas dated; youngest dated by K-Ar                                                                                         |
| North Cotter Cliffs, E Hallett Peninsula<br>[72° 20.98'S, 170° 16.38'E]                                | 6.60±0.80              | <b>Cold-based</b>           | Multiple lava-fed deltas; only one delta dated; by K-Ar                                                                                                           |
| North of Salmon Cliff, W Hallett Peninsula<br>[72° 21.55'S, 170° 07.36'E]                              | 7.05±0.04              | <b>Cold-based</b>           | Multiple lava-fed deltas; only one delta dated                                                                                                                    |
| Roberts Cliff, W Hallett Peninsula<br>[72° 24.04'S, 170° 03.28'E]                                      | 7.26±0.05              | <b>Cold-based</b>           | Multiple lava-fed deltas; only one delta dated                                                                                                                    |
| Redcastle Ridge, W Hallett Peninsula<br>[72° 25.83'S, 169° 56.39'E]                                    | 7.41±0.04              | <b>Cold-based</b>           | Multiple lava-fed deltas; only one delta dated                                                                                                                    |
| Northern Coulman Island (unconformity within sequence)<br>[73° 20.45'S, 169° 46.88'E]                  | c. 7.4                 | <b>Wet-based</b>            | Age by K-Ar; probably caused by expanded much thicker ice sheet                                                                                                   |
| Coulman Island (eruptions)<br>[73°30'S, 169°45'E]                                                      | 7.2±1.0 – 7.6±0.8      | <b>Cold-based</b>           | Multiple lava-fed deltas; ages by K-Ar                                                                                                                            |
| West Edisto Inlet (Herschel Tuffaceous Moraine), W of Hallett Peninsula<br>[72° 21.64'S, 169° 54.97'E] | c. 7.4                 | <b>Wet-based</b>            | Lacustrine sequence infilled by ash turbidites situated on the flank of a valley-filling glacier; age similar to or older than nearby Hallett Peninsula sequences |
| Tucker Glacier<br>[72° 34.84'S, 169° 18.04'E]                                                          | 7.61±0.05              | <b>Wet-based</b>            | Thermal regime possibly reflects that of expanded adjacent outlet glacier                                                                                         |
|                     |                        | <b>Substantial time gap</b> |                                                                               |
| Minna Hook (7)<br>[78.653°S, 167.207°E]                                                                | 9.40±0.30              | <b>Wet-based</b>            |                                                                                                                                                                   |
| Minna Hook (6)<br>[78.664°S, 167.214°E]                                                                | 9.53±0.07              | <b>Wet-based</b>            | Felsic dome with hyaloclastite breccia base and basal diamict (till) on glacially eroded surface                                                                  |
| Mandible Cirque, Daniell Peninsula<br>[73° 06.49'S, 169° 24.97'E]                                      | 9.68±0.05              | <b>Wet-based</b>            | Felsic dome in sequence with hyaloclastite breccia dome bases, diamict (till) and glacially eroded surface                                                        |
| Cape Jones, Daniell Peninsula<br>[73° 16.88'S, 169° 11.97'E]                                           | 9.87±0.09              | <b>Cold-based</b>           | Minor erosion but no diamict or fluvial sediments; volcano slopes pristine above c. 400-600 m a.s.l.                                                              |
| Cape Phillips, Daniell Peninsula<br>[73° 04.52'S, 169° 36.60'E]                                        | 9.95±0.07              | <b>Cold-based</b>           | Minor erosion but no diamict or fluvial sediments                                                                                                                 |
| Minna Hook (unconformity)                                                                              | c. 10.38 – 9.40        | <b>Wet-based</b>            | Age bracketed by dated units;                                                                                                                                     |



|                                                                               |                  |                  |                                                    |
|-------------------------------------------------------------------------------|------------------|------------------|----------------------------------------------------|
| within sequence)<br>[78.65°S, 167.20°E]                                       |                  |                  | probably caused by expanded much thicker ice sheet |
| Minna Hook (5)**<br>[78.641°S, 167.205°E]                                     | c. 11.47 – 10.39 | <b>Wet-based</b> | Age bracketed by dated units                       |
| Minna Hook (4)**<br>[78.586°S, 167.124°E]                                     | 10.50±0.30       | <b>Wet-based</b> |                                                    |
| Minna Hook (3)**<br>[78.590°S, 167.164°E]                                     | c. 11.2 – 10.5   | <b>Wet-based</b> | Age bracketed by dated units                       |
| Minna Hook (unconformity within sequence)<br>[78.59°S, 167.14°E] <sup>o</sup> | c. 11.2 – 10.6   | <b>Wet-based</b> | Age bracketed by dated units                       |
| Minna Hook (2)**<br>[78.617°S, 167.192°E]                                     | c. 11.40 – 11.20 | <b>Wet-based</b> | Age bracketed by dated units                       |
| Minna Hook (1)<br>[78.591°S, 167.165°E]                                       | c. 11.40 – 11.21 | <b>Wet-based</b> | Age bracketed by dated units                       |

\* All ages by  $^{40}\text{Ar}$ - $^{39}\text{Ar}$  except where otherwise indicated in comments; from [Fargo \(2009\)](#), [Gemelli \(2009\)](#) and [Smellie et al. \(2011\)](#); see [Table 2](#) for analytical details of ages.

\*\* Despite similar or overlapping ages, the dated informally-numbered units at Minna Hook included in this table relate to different lava-fed deltas.

**Table DR2.** Summary details of  $^{40}\text{Ar}$ - $^{39}\text{Ar}$  ages for volcanic sequences in Victoria Land used in this study

| Sample        | Locality                                                                         | Technique          | Material   | $^{39}\text{Ar}\%$<br>concordant<br>segment<br>(plateau) | n <sup>a</sup> | Error-<br>weighte<br>d mean<br>age<br>(Ma) <sup>b</sup> | ±2σ<br>(internal<br>error) | MSWD <sup>c</sup> | Total<br>gas<br>age<br>(Ma) | ±2σ<br>(internal<br>error) | Ref                |
|---------------|----------------------------------------------------------------------------------|--------------------|------------|----------------------------------------------------------|----------------|---------------------------------------------------------|----------------------------|-------------------|-----------------------------|----------------------------|--------------------|
| 11-01-06 JS5  | Cape Washington (2)<br>[74° 38.59'S, 165° 25.32'E]                               | Lazer step heating | Groundmass | 61.6                                                     | 4              | <b>1.729</b>                                            | <b>0.037</b>               | 1.19              | 1.852                       | 0.080                      | Gemelli 2009       |
| 11-01-06 JS3  | Cape Washington (1)<br>[74° 38.59'S, 165° 25.32'E]                               | Lazer step heating | Groundmass | 60.8                                                     | 3              | <b>2.885</b>                                            | <b>0.080</b>               | 1.63              | 2.958                       | 0.037                      | Gemelli 2009       |
| 2-01-06 JS7   | Bluff 7 km WNW of Cape Daniell, Daniell Peninsula<br>[72° 40.33'S, 169° 43.07'E] | Lazer step heating | Groundmass | 53.9                                                     | 4              | <b>6.338</b>                                            | <b>0.050</b>               | 1.8               | 6.445                       | 0.045                      | Smellie et al 2011 |
| 1-01-06 JS5   | First bluff N of Salmon Cliff, Hallett Peninsula<br>[72° 21.55'S, 170° 07.36'E]  | Lazer step heating | Groundmass | 74.9                                                     | 5              | <b>7.049</b>                                            | <b>0.040</b>               | 0.22              | 7.070                       | 0.043                      | Smellie et al 2011 |
| 29-12-05 JS10 | Roberts Cliff, Hallett Peninsula<br>[72° 24.04'S, 170° 03.28'E]                  | Lazer step heating | Groundmass | 72.3                                                     | 5              | <b>7.257</b>                                            | <b>0.050</b>               | 1.5               | 7.322                       | 0.053                      | Smellie et al 2011 |
| 4-01-06 JS1   | Redcastle Ridge, Hallett Peninsula<br>[72° 25.83'S, 169° 56.39'E]                | Lazer step heating | Groundmass | 61.0                                                     | 4              | <b>7.407</b>                                            | <b>0.043</b>               | 0.36              | 7.441                       | 0.047                      | Smellie et al 2011 |
| 4-01-06 JS11  | S flank of Tucker                                                                | Lazer step heating | Groundmass | 57.3                                                     | 4              | <b>7.605</b>                                            | <b>0.049</b>               | 0.20              | 7.322                       | 0.062                      | Smellie et al      |

|              |                                                                 |                    |                 |       |    |              |              |      |              |              |                    |
|--------------|-----------------------------------------------------------------|--------------------|-----------------|-------|----|--------------|--------------|------|--------------|--------------|--------------------|
|              | Glacier, 4.5 km NW of Crater Cirque [72° 34.84'S, 169° 18.04'E] |                    |                 |       |    |              |              |      |              |              | 2011               |
| 19-12-05 JS2 | Mandible Cirque, Daniell Peninsula [73° 06.49'S, 169° 24.97'E]  | Total fusion       | Alkali feldspar | -     | 8  | <b>9.683</b> | <b>0.051</b> | 0.50 | 9.669        | 0.051        | Smellie et al 2011 |
| 21-12-05 JS8 | Cape Jones, Daniell Peninsula [73° 16.88'S, 169° 11.97'E]       | Lazer step heating | Groundmass      | 54.4  | 4  | <b>9.866</b> | <b>0.088</b> | 1.6  | 10.144       | 0.092        | Smellie et al 2011 |
| 4-01-06 JS6  | Cape Phillips, Daniell Peninsula [73° 04.52'S, 169° 36.60'E]    | Lazer step heating | Groundmass      | -     | -  | No plateau   | -            | -    | <b>9.950</b> | <b>0.066</b> | Smellie et al 2011 |
| MB06-587     | Minna Hook (7) [78.653°S, 167.207°E]                            | Lazer step heating | Groundmass      | 90.76 | 8  | <b>9.4</b>   | <b>0.3</b>   | 0.64 | 9.0          | 0.4          | Fargo 2009         |
| MB06-504     | Minna Hook (6) [78.664°S, 167.214°E]                            | Lazer step heating | Groundmass      | 100   | 10 | <b>9.53</b>  | <b>0.07</b>  | 1.68 | 9.51         | 0.07         | Fargo 2009         |
| MB06-765     | Minna Hook (4) [78.586°S, 167.124°E]                            | Lazer step heating | Groundmass      | 100   | 10 | <b>10.5</b>  | <b>0.3</b>   | 1.23 | 11.0         | 0.7          | Fargo 2009         |
| MB06-509     | Minna Hook (bracketing age) [78.659°S, 167.212°E]               | Lazer step heating | Kaersutite      | 100   | 9  | <b>10.39</b> | <b>0.09</b>  | 0.85 | 10.36        | 0.09         | Fargo 2009         |
| MB06-761     | Minna Hook (bracketing age) [78.587°S, 166.843°E]               | Lazer step heating | Groundmass      | 78.88 | 6  | <b>11.2</b>  | <b>0.1</b>   | 5.17 | 11.5         | 0.2          | Fargo 2009         |
| MB06-763     | Minna Hook (bracketing age) [78.585°S, 167.127°E]               | Lazer step heating | Groundmass      | 63.72 | 5  | <b>11.42</b> | <b>0.08</b>  | 1.86 | 11.8         | 0.4          | Fargo 2009         |
| MB06-546     | Minna Hook (bracketing age) [78.641°S, 167.205°E]               | Lazer step heating | Groundmass      | 81.8  | 6  | <b>11.47</b> | <b>0.08</b>  | 4.14 | 11.6         | 0.09         | Fargo 2009         |

<sup>a</sup> – number of steps or analyses used in the error-weighted mean calculation.

<sup>b</sup> – preferred ages indicated in bold typeface.

<sup>c</sup> – mean squares of weighted deviates.

Notes:

1. Ages of units not dated directly (Minna Hook only) were bracketed by dating units higher and lower in the succession.

2. All ages are relative to Fish Canyon sanidine at 28.02 Ma ([Renne et al., 1998](#)) and decay constants are after [Steiger and Jaeger \(1977\)](#).

## REFERENCES CITED

- Fargo, A.F., 2009,  $^{40}\text{Ar}/^{39}\text{Ar}$  geochronological analysis of Minna Bluff, Antarctica: Evidence for past glacial events within the Ross Embayment. MSc thesis, New Mexico Institute of Mining and Technology, USA, 48 p.
- Gemelli, M., 2009, Mineralogical, geochemical, and isotopic tools for the reconstruction of subglacial and marine eruptive paleoenvironments in Antarctica. PhD thesis, University of Pisa, Italy, 119 p.
- Renne, P.R., Swisher, C.C., Deino, A.L., Karner, D.B., Owens, T., and DePaulo, D.J., 1998, Intercalibration of standards, absolute ages and uncertainties in  $^{40}\text{Ar}/^{39}\text{Ar}$  dating. *Chemical Geology*, v. 145, p. 117-152.
- Smellie, J.L., Rocchi, S., Gemelli, M., Di Vincenzo, G., and Armienti, P., 2011, A thin predominantly cold-based Late Miocene East Antarctic ice sheet inferred from glaciovolcanic sequences in northern Victoria Land, Antarctica. *Palaeogeography Palaeoclimatology Palaeoecology*, v. 307, p. 129-149.
- Steiger, R.H., and Jaeger, E., 1977, Subcommittee on Geochronology: convention on the use of decay constants in geo- and cosmochemistry. *Earth and Planetary Science Letters*, v. 36, p. 359-362.
